# Supplementary material for: The acute transcriptional response of the coral Acropora millepora to immune challenge: expression of GiMAP/IAN genes links the innate immune responses of corals with those of mammals and plants
Source: PubMed Central journal article supplement (PMC3723955; doi:10.1186/1471-2164-14-400), 2013-06-14
Supplement: 1471-2164-14-400-S2.pdf [file 1471-2164-14-400-S2.pdf]

# Genes responding to Poly I:C

| Cluster       | Assignment                                                    | Fold change (Poly I:C) | Best non-cnidarian BlastP hit (Locus ID) | Organism           | e value NR | Best N. vectensis BlastP hit (Locus ID) | e value Nv | Best A. digitifera BlastP hit (Gene model) | e value Ad |
|---------------|---------------------------------------------------------------|------------------------|------------------------------------------|--------------------|------------|-----------------------------------------|------------|--------------------------------------------|------------|
| Cluster000112 | Serine/threonine protein kinase / RING?                       | 3.976                  | XP_001629791                             | Branchiostoma      | 0.00E+00   | XP_001629791                            | 0.00E+00   | aug_v2a.07074                              | 0.00E+00   |
| Cluster005964 | Neuroblast differentiation-associated protein AHNAK           | 3.933                  | XP_002807401                             | Callithrix         | 1.00E-16   | XP_001625669                            | 3.00E-13   | aug_v2a.05975                              | 0.00E+00   |
| Cluster017126 | Tumor necrosis factor receptor superfamily                    | 3.647                  | EGD74812                                 | Salpingoeca        | 5.00E-10   | XP_001629793                            | 1.00E-07   | aug_v2a.14012                              | 3.00E-143  |
| Cluster022357 | Collagen alpha-1(XII)                                         | 3.608                  | XP_002936246                             | Xenopus            | 4.00E-24   | XP_001640936                            | 2.00E-42   | aug_v2a.05363                              | 5.00E-123  |
| Cluster000197 | Lipophorin precursor                                          | 3.472                  | XP_002738323                             | Saccoglossus       | 3.00E-112  | XP_001640190                            | 1.00E-29   | aug_v2a.01780                              | 0.00E+00   |
| Cluster010294 | No hit                                                        | 3.423                  | No significant hit                       |                    |            | No hit                                  |            | No hit                                     |            |
| Cluster000809 | NFX1-type zinc finger                                         | 3.282                  | XP_002593922                             | Branchiostoma      | 0.00E+00   | XP_001622790                            | 0.00E+00   | aug_v2a.21009                              | 0.00E+00   |
| Cluster010611 | Sacs protein / saccin                                         | 3.223                  | CAE45964                                 | Homo               | 4.00E-59   | XP_001636175                            | 5.00E-67   | aug_v2a.10290                              | 9.00E-126  |
| Cluster024126 | Collagen, type alpha-1(XII)                                   | 3.158                  | EHH55386                                 | Macaca             | 3.00E-05   | XP_001640936                            | 1.00E-13   | aug_v2a.05363                              | 6.00E-62   |
| Cluster000008 | Collagen, type alpha-1(XXIX)                                  | 3.074                  | XP_002734929                             | Saccoglossus       | 2.00E-61   | XP_001632436                            | 2.00E-58   | aug_v2a.05363                              | 0.00E+00   |
| Cluster012102 | Glucose-methanol-choline oxidoreductase / cholesterol oxidase | 3.019                  | XP_002603265                             | Branchiostoma      | 2.00E-154  | No hit                                  |            | aug_v2a.18867                              | 0.00E+00   |
| Cluster009161 | Collagen alpha-6(VI) chain                                    | 2.649                  | EKC40283                                 | Crassostrea        | 5.00E-68   | XP_001632943                            | 1.00E-57   | aug_v2a.05363                              | 8.00E-178  |
| Cluster001819 | Glutamate synthase [NADPH]                                    | 2.431                  | XP_002612218                             | Branchiostoma      | 0.00E+00   | XP_001630774                            | 0.00E+00   | aug_v2a.08445                              | 0.00E+00   |
| Cluster000000 | Microtubule-actin crosslinking factor                         | 2.361                  | XP_002606270                             | Branchiostoma      | 0.00E+00   | XP_001629769                            | 0.00E+00   | aug_v2a.03009                              | 0.00E+00   |
| Cluster027576 | Poly(Asp) protein                                             | 2.341                  |                                          |                    |            | No hit                                  |            | No hit                                     |            |
| Cluster000010 | Viral A-type inclusion protein / kinesin                      | 2.239                  | XP_001687712                             | Leishmania         | 3.00E-13   | No hit                                  |            | aug_v2a.18644                              | 0.00E+00   |
| Cluster014845 | Aquaporin 4                                                   | 0.432                  | AEI25531                                 | Penaeus            | 2.00E-63   | XP_001633187                            | 5.00E-104  | aug_v2a.21442                              | 2.00E-51   |
| Cluster024836 | No hit                                                        | 0.422                  | No significant hit                       |                    |            | No hit                                  |            | aug_v2a.18833                              | 4.00E-49   |
| Cluster009110 | No hit                                                        | 0.422                  | No significant hit                       |                    |            | No hit                                  |            | No hit                                     |            |
| Cluster011123 | Glucose-methanol-choline oxidoreductase                       | 0.418                  | XP_797018                                | Strongylocentrotus | 6.00E-165  | No hit                                  |            | aug_v2a.13041                              | 0.00E+00   |
| Cluster025472 | Similar to zonadhesin                                         | 0.413                  | XP_002735705                             | Saccoglossus       | 4.00E-09   | XP_001623715                            | 4.00E-39   | aug_v2a.07532                              | 7.00E-108  |
| Cluster027673 | No hit                                                        | 0.385                  |                                          |                    |            | No hit                                  |            | No hit                                     |            |
| Cluster006973 | Cytochrome P450; family 3                                     | 0.383                  | XP_002110410                             | Trichoplax         | 4.00E-113  | XP_001625659                            | 5.00E-131  | aug_v2a.16872                              | 0.00E+00   |
| Cluster019644 | Membrane-spanning 4-domains                                   | 0.377                  | XP_001923190                             | Danio              | 2.00E-04   | No hit                                  |            | aug_v2a.00537                              | 5.00E-128  |
| Cluster015370 | No hit                                                        | 0.375                  | No significant hit                       |                    |            | No hit                                  |            | No hit                                     |            |

|               |                                                             |       |                             |           |              |           |               |           |
|---------------|-------------------------------------------------------------|-------|-----------------------------|-----------|--------------|-----------|---------------|-----------|
| Cluster020716 | No hit                                                      | 0.367 | No significant hit          |           | No hit       |           | aug_v2a.03590 | 2.00E-34  |
| Cluster010905 | Unique to Nematostella and Acropora                         | 0.342 | No significant hit          |           | XP_001626516 | 2.00E-57  | aug_v2a.06335 | 5.00E-150 |
| Cluster002820 | Hypothetical protein Esi_0067_0076                          | 0.339 | CBJ27377 Ectocarpus         | 7.00E-13  | No hit       |           | aug_v2a.10728 | 0.00E+00  |
| Cluster020217 | No hit                                                      | 0.339 | No significant hit          |           | No hit       |           | aug_v2a.17443 | 3.00E-30  |
| Cluster009013 | No hit                                                      | 0.336 | No significant hit          |           | No hit       |           | No hit        |           |
| Cluster026412 | C009-F8 [Acropora millepora]                                | 0.323 | No significant hit          |           | No hit       |           | aug_v2a.21737 | 7.00E-121 |
| Cluster017538 | No hit                                                      | 0.317 | No significant hit          |           | No hit       |           | aug_v2a.00046 | 4.00E-42  |
| Cluster023562 | No hit                                                      | 0.313 | No significant hit          |           | No hit       |           | No hit        |           |
| Cluster018949 | C005-B5 [Acropora millepora] 4e-48/ Soma ferritin           | 0.303 | AF467696_1 Dermacentor      | 8.00E-14  | XP_001627335 | 8.00E-17  | aug_v2a.18796 | 4.00E-42  |
| Cluster009706 | Secreted frizzled-related protein 2                         | 0.302 | NP_001071964 Ciona          | 7.00E-21  | XP_001638620 | 1.00E-22  | aug_v2a.11469 | 0.00E+00  |
| Cluster015600 | No hit                                                      | 0.296 | No significant hit          |           | No hit       |           | No hit        |           |
| Cluster026469 | TIR1 [Acropora millepora] 2e-61                             | 0.295 | XP_002586973 Branchiostoma  | 9.00E-11  | XP_001641546 | 9.00E-13  | aug_v2a.02686 | 2.00E-51  |
| Cluster024059 | Argonaute-like                                              | 0.292 | XP_002737100 Saccoglossus   | 2.00E-117 | XP_001630646 | 2.00E-127 | aug_v2a.00902 | 0.00E+00  |
| Cluster001145 | Patched domain-containing protein 3                         | 0.291 | XP_002598387 Branchiostoma  | 2.00E-98  | XP_001629035 | 0.00E+00  | aug_v2a.12942 | 0.00E+00  |
| Cluster015736 | Hypothetical protein                                        | 0.288 | XP_002740514 Saccoglossus   | 5.00E-18  | XP_001627459 | 2.00E-48  | aug_v2a.00569 | 1.00E-72  |
| Cluster017128 | Alpha crystallin hsps23 protein                             | 0.282 | XP_003113991 Caenorhabditis | 6.00E-15  | XP_001625684 | 7.00E-16  | aug_v2a.15424 | 4.00E-69  |
| Cluster011031 | Fibrillar collagen, hypothetical                            | 0.282 | EKX49450 Guillardia         | 1.00E-18  | XP_001639246 | 4.00E-52  | aug_v2a.11457 | 5.00E-152 |
| Cluster013013 | No hit                                                      | 0.277 | No significant hit          |           | No hit       |           | aug_v2a.08576 | 1.00E-42  |
| Cluster008529 | Neuronal acetylcholine receptor subunit beta-3              | 0.275 | XP_002819095 Pongo          | 1.00E-70  | XP_001628236 | 7.00E-86  | aug_v2a.11311 | 2.00E-69  |
| Cluster015761 | WD-40 repeat / TPR_2 / Fis family transcriptional regulator | 0.271 | YP_007109256 Geitlerinema   | 2.00E-25  | XP_001634111 | 2.00E-35  | aug_v2a.16679 | 2.00E-128 |
| Cluster016915 | Hemicentin / peroxidase                                     | 0.269 | XP_002405927 Ixodes         | 2.00E-21  | XP_001624042 | 3.00E-19  | aug_v2a.22439 | 5.00E-166 |
| Cluster014162 | No hit                                                      | 0.263 | No significant hit          |           | No hit       |           | aug_v2a.04638 | 8.00E-15  |
| Cluster027019 | Hypothetical protein                                        | 0.260 | XP_002602912 Branchiostoma  | 3.00E-13  | XP_001641728 | 5.00E-06  | aug_v2a.02060 | 3.00E-77  |
| Cluster021224 | Hypothetical protein                                        | 0.259 | EJY70955 Oxytricha          | 1.00E-05  | No hit       |           | aug_v2a.12582 | 8.00E-163 |
| Cluster022120 | No hit                                                      | 0.257 | No significant hit          |           | No hit       |           | No hit        |           |
| Cluster005198 | No hit                                                      | 0.252 | No significant hit          |           | No hit       |           | aug_v2a.02663 | 0.00E+00  |
| Cluster014577 | Endonuclease domain-containing                              | 0.239 | XP_001345641 Danio          | 4.00E-11  | No hit       |           | aug_v2a.08450 | 0.00E+00  |
| Cluster025912 | Integrase / recombinase                                     | 0.233 | XP_002736419 Saccoglossus   | 5.00E-20  | XP_001639092 | 2.00E-18  | aug_v2a.02878 | 7.00E-36  |
| Cluster014878 | Olfactomedin-like protein 2B                                | 0.231 | CAG01427 Tetraodon          | 2.00E-45  | No hit       |           | aug_v2a.22273 | 0.00E+00  |
| Cluster004646 | Matrix metalloproteinase                                    | 0.212 | XP_002738586 Saccoglossus   | 9.00E-114 | XP_001640669 | 8.00E-168 | aug_v2a.02174 | 0.00E+00  |
| Cluster011324 | Olfactomedin-like protein                                   | 0.206 | CAG01427 Tetraodon          | 4.00E-46  | No hit       |           | aug_v2a.22273 | 2.00E-146 |
| Cluster010496 | Conserved Hypothetical protein [Hydra + fungi]              | 0.194 | EKC19238 Crassostrea        | 1.00E-25  | No hit       |           | aug_v2a.00773 | 3.00E-104 |

|               |                                                      |       |                    |                    |           |              |           |               |           |
|---------------|------------------------------------------------------|-------|--------------------|--------------------|-----------|--------------|-----------|---------------|-----------|
| Cluster012254 | 2'-5'-oligoadenylate synthase 1G                     | 0.173 | XP_002704723       | Bos                | 5.00E-16  | XP_001635415 | 2.00E-20  | aug_v2a.01178 | 1.00E-55  |
| Cluster018924 | Nucleotide-binding oligomerization domain containing | 0.167 | XP_002732748       | Saccoglossus       | 1.00E-18  | XP_001622189 | 4.00E-28  | aug_v2a.11758 | 4.00E-120 |
| Cluster011563 | Senescence-associated protein [Mytilus]              | 0.157 | AEM36070           | Mytilus            | 3.00E-40  | XP_001618678 | 8.00E-41  | No hit        |           |
| Cluster013676 | No hit                                               | 0.134 | No significant hit |                    |           | No hit       |           | No hit        |           |
| Cluster018287 | No hit                                               | 0.130 | No significant hit |                    |           | No hit       |           | aug_v2a.02395 | 2.00E-145 |
| Cluster015535 | Hypothetical protein cnidarians and insects          | 0.129 | XP_003396199       | Bombus             | 3.00E-10  | XP_001628368 | 3.00E-04  | aug_v2a.24381 | 1.00E-12  |
| Cluster020105 | No hit                                               | 0.127 | No significant hit |                    |           | No hit       |           | aug_v2a.00315 | 3.00E-58  |
| Cluster005951 | Peroxidase                                           | 0.113 | XP_623940          | Apis               | 4.00E-106 | XP_001622220 | 3.00E-109 | aug_v2a.24630 | 0.00E+00  |
| Cluster021271 | Cys and Gly-rich protein 1                           | 0.112 | XP_003893354       | Papio              | 1.00E-20  | XP_001629731 | 5.00E-16  | aug_v2a.12783 | 5.00E-25  |
| Cluster004281 | No hit                                               | 0.078 | No significant hit |                    |           | No hit       |           | aug_v2a.02060 | 4.00E-26  |
| Cluster014665 | Actin, cytoskeletal 2B                               | 0.076 | XP_001176242       | Strongylocentrotus | 0.00E+00  | XP_001630583 | 0.00E+00  | aug_v2a.05332 | 0.00E+00  |
| Cluster018020 | Sacsin / DnaJ-like protein subfamily C               | 0.075 | XP_417138          | Gallus             | 3.00E-36  | XP_001624963 | 2.00E-42  | aug_v2a.03342 | 3.00E-158 |
| Cluster023450 | Spliceosome RNA helicase                             | 0.069 | CAM25877           | Homo               | 5.00E-173 | XP_001635457 | 3.00E-175 | aug_v2a.09757 | 1.00E-161 |
| Cluster025642 | No hit                                               | 0.066 | No significant hit |                    |           | No hit       |           | aug_v2a.02568 | 2.00E-53  |
| Cluster010227 | Exonuclease 3-5 domain-like                          | 0.053 | XP_002597496       | Branchiostoma      | 8.00E-105 | XP_001639016 | 3.00E-143 | aug_v2a.03677 | 0.00E+00  |
| Cluster027039 | No hit                                               | 0.053 | No significant hit |                    |           | No hit       |           | aug_v2a.00732 | 2.00E-155 |
| Cluster019507 | Hypothetical protein                                 | 0.032 | XP_003731402       | Strongylocentrotus | 3.00E-10  | XP_001625301 | 1.00E-23  | aug_v2a.16067 | 1.00E-41  |
| Cluster026715 | Hypothetical protein                                 | 0.032 | EGD80721           | Salpingoeca        | 7.00E-11  | No hit       |           | aug_v2a.18130 | 1.00E-18  |
| Cluster006275 | Hypothetical protein                                 | 0.000 | XP_002937628       | Xenopus            | 4.00E-18  | No hit       |           | aug_v2a.03714 | 3.00E-16  |
| Cluster016383 | Hypothetical protein                                 | 0.000 | XP_002118488       | Trichoplax         | 3.00E-70  | XP_001629388 | 1.00E-46  | aug_v2a.17310 | 2.00E-92  |
| Cluster023841 | Carbonic anhydrase                                   | 0.000 | EKC20938           | Crassostrea        | 9.00E-22  | XP_001627923 | 3.00E-21  | aug_v2a.19067 | 3.00E-51  |
| Cluster004138 | Pre-mRNA processing factor 6                         | 0.000 | JAA59769           | Rhipicephalus      | 0.00E+00  | XP_001625285 | 0.00E+00  | aug_v2a.00906 | 4.00E-131 |
