# Supplementary material for: The acute transcriptional response of the coral Acropora millepora to immune challenge: expression of GiMAP/IAN genes links the innate immune responses of corals with those of mammals and plants
Source: PubMed Central journal article supplement (PMC3723955; doi:10.1186/1471-2164-14-400), 2013-06-14
Supplement: 1471-2164-14-400-S3.pdf [file 1471-2164-14-400-S3.pdf]

# Genes responding to MDP

| Cluster        | Assignment                      | Fold change (MDP) | Best non-cnidarian BlastP hit (Locus ID) | Organism           | e value NR | Best N. vectensis BlastP hit (Locus ID) | e value Nv | Best A. digitifera BlastP hit (Gene model) | e value Ad |
|----------------|---------------------------------|-------------------|------------------------------------------|--------------------|------------|-----------------------------------------|------------|--------------------------------------------|------------|
| Cluster023274  | Serine protease                 | Inf               | NP_999239                                | Sus                | 1.00E-42   | XP_001633098                            | 7.00E-48   | aug_v2a.11369                              | 1.00E-43   |
| Cluster009040  | YD-repeat containing protein    | 251.961           | ZP_04608751                              | Micromonospora     | 2.00E-07   | No hit                                  |            | aug_v2a.16950                              | 2.00E-133  |
| Cluster024980  | GTPase IMAP family member       | 229.304           | ACQ58961                                 | Anoplopoma         | 2.00E-16   | No hit                                  |            | aug_v2a.23824                              | 1.00E-83   |
| Cluster012256  | GTPase IMAP family member       | 115.484           | XP_001914755                             | Equus              | 3.00E-11   | No hit                                  |            | aug_v2a.23822                              | 4.00E-84   |
| Cluster023012  | No significant hits             | 60.515            |                                          |                    |            | No hit                                  |            | No hit                                     |            |
| Cluster017267  | C009-F8-like                    | 59.731            | No other hits                            | Acropora millepora | 1.00E-14   | No hit                                  |            | aug_v2a.10491                              | 4.00E-121  |
| Cluster015015  | GTPase IMAP family member       | 56.249            | NP_001037788                             | Danio              | 1.00E-11   | No hit                                  |            | aug_v2a.23823                              | 2.00E-101  |
| Cluster013111  | GTP-binding protein EsdC        | 32.288            | XP_003349531                             | Sordaria           | 6.00E-94   | No hit                                  |            | No hit                                     |            |
| Cluster025107  | Nucleoside phosphotylase        | 32.131            | YP_003885815                             | Cyanothece         | 5.00E-09   | No hit                                  |            | aug_v2a.01084                              | 2.00E-36   |
| Cluster025657  | C009-F8                         | 18.963            | No other hits                            | Acropora millepora | 2.00E-52   | No hit                                  |            | aug_v2a.14070                              | 3.00E-76   |
| Cluster026965  | Non-canonical histone H3.3      | 14.305            | XP_002113772                             | Trichoplax         | 1.00E-91   | XP_001623766                            | 1.00E-91   | aug_v2a.13799                              | 1.00E-19   |
| Cluster002193  | Formate acetyltransferase       | 13.799            | XP_002596398                             | Branchiostoma      | 0.00E+00   | No hit                                  |            | aug_v2a.18719                              | 0.00E+00   |
| Cluster002489  | CDH1-D                          | 12.647            | AAL31950                                 | Gallus             | 1.00E-30   | No hit                                  |            | No hit                                     |            |
| Cluster013871  | No significant hits             | 10.926            |                                          |                    |            | No hit                                  |            | No hit                                     |            |
| Cluster020990m | Conserved hypothetical protein  | 9.770             | CAJ30045                                 | Magnetospirillum   | 1.00E-56   | No hit                                  |            | No hit                                     |            |
| Cluster022345  | Senescence-associated protein   | 9.321             | XP_003542256                             | Glycine max        | 3.00E-27   | XP_001618890                            | 2.00E-17   | No hit                                     |            |
| Cluster006412  | Senescence-associated protein   | 9.076             | XP_001900327                             | Brugia             | 7.00E-58   | XP_001618678                            | 5.00E-33   | No hit                                     |            |
| Cluster019383  | Histone H2B                     | 8.847             | CBM82447                                 | Rhabdopleura       | 2.00E-59   | XP_001617661                            | 2.00E-54   | aug_v2a.03254                              | 9.00E-53   |
| Cluster023174  | Glycosyl transferase family     | 8.815             | XP_003729243                             | Strongylocentrotus | 9.00E-94   | XP_001637936                            | 1.00E-110  | aug_v2a.03764                              | 7.00E-99   |
| Cluster015042  | igLON family member / lachesin  | 8.482             | XP_002938252                             | Xenopus            | 6.00E-21   | XP_001625597                            | 2.00E-17   | aug_v2a.16744                              | 7.00E-98   |
| Cluster013830  | Hypothetical protein            | 8.150             | XP_002723895                             | Oryctolagus        | 9.00E-21   | No hit                                  |            | No hit                                     |            |
| Cluster002963  | rRNA promoter binding protein   | 8.038             | EFN65035                                 | Camponotus         | 4.00E-36   | XP_001624693                            | 1.00E-10   | No hit                                     |            |
| Cluster018413  | No significant hits             | 6.865             |                                          |                    |            | No hit                                  |            | aug_v2a.06165                              | 3.00E-45   |
| Cluster007853p | Hypothetical protein            | 6.523             | XP_003614392                             | Medicago           | 2.00E-79   | XP_001618678                            | 2.00E-30   | No hit                                     |            |
| Cluster013535  | FGF receptor                    | 6.150             | NP_001037558                             | Bombyx             | 1.00E-05   | XP_001637292                            | 4.00E-06   | aug_v2a.17718                              | 7.00E-131  |
| Cluster023536p | Hypothetical protein            | 5.934             | XP_003542256                             | Medicago           | 4.00E-30   | XP_001618890                            | 2.00E-18   | No hit                                     |            |
| Cluster008124m | CDH1-D                          | 5.824             | AAL31950                                 | Gallus             | 2.00E-20   | No hit                                  |            | No hit                                     |            |
| Cluster012844  | No significant hits             | 5.754             |                                          |                    |            | No hit                                  |            | aug_v2a.03567                              | 1.00E-71   |
| Cluster017835  | Hypothetical protein            | 5.561             | XP_710281                                | Candida            | 4.00E-25   | No hit                                  |            | No hit                                     |            |
| Cluster018298  | Cephalosporin hydroxylase       | 5.398             | ZP_08430922                              | Moorea             | 9.00E-50   | XP_001635762                            | 2.00E-58   | aug_v2a.16414                              | 2.00E-154  |
| Cluster004461p | Pol-like protein/transposon TX1 | 5.391             | XP_002740396                             | Saccoglossus       | 9.00E-90   | XP_001631247                            | 6.00E-07   | aug_v2a.22112                              | 0.00E+00   |

|                |                                              |       |                 |                            |                 |              |           |               |           |
|----------------|----------------------------------------------|-------|-----------------|----------------------------|-----------------|--------------|-----------|---------------|-----------|
| Cluster015137  | Cathepsin L-like cysteine proteinase         | 5.039 | AEO32878        | Amblyomma                  | 6.00E-139       | XP_001628790 | 1.00E-167 | aug_v2a.13010 | 3.00E-140 |
| Cluster019424  | Uncharacterised plant protein                | 4.781 | XP_002463101    | Sorghum                    | 2.00E-07        | No hit       |           | aug_v2a.12463 | 4.00E-27  |
| Cluster017997  | No significant hits                          | 4.585 |                 |                            |                 | No hit       |           | No hit        |           |
| Cluster012104  | <b>Choloylglycine hydrolase pA79-1</b>       | 4.526 | YP_002363808    | Methylocella               | 2.00E-63        | No hit       |           | aug_v2a.03137 | 0.00E+00  |
| Cluster026172m | Cytochrome P450 monooxygenase                | 3.810 | GAA96382        | Mixia                      | 7.00E-34        | No hit       |           | No hit        |           |
| Cluster014083  | No significant hits                          | 0.255 |                 |                            |                 | No hit       |           | No hit        |           |
| Cluster009725  | Guanylate-binding protein, N-terminal domain | 0.246 | XP_002610120    | Branchiostoma              | 8.00E-22        | XP_001638595 | 2.00E-88  | aug_v2a.12397 | 8.00E-115 |
| Cluster008297  | Notch/pentraxin-like unknown                 | 0.246 | XP_002599260    | Branchiostoma              | 6.00E-51        | XP_001631432 | 6.00E-16  | aug_v2a.08407 | 0.00E+00  |
| Cluster000397  | EGF-containing unknown                       | 0.242 | XP_003385535    | Amphimedon                 | 4.00E-132       | XP_001639249 | 4.00E-56  | aug_v2a.21085 | 0.00E+00  |
| Cluster001272  | SCO-spondin / hemicentrin                    | 0.224 | EKC21775        | Crassostrea                | 0.00E+00        | XP_001639686 | 5.00E-96  | aug_v2a.12523 | 0.00E+00  |
| Cluster015890  | Hypothetical polydom like                    | 0.213 | XP_002604604    | Branchiostoma              | 4.00E-66        | XP_001621820 | 2.00E-56  | aug_v2a.08407 | 3.00E-116 |
| Cluster006582  | Uncharacterized protein                      | 0.197 | XP_003728220    | Strongylocentrotus         | 8.00E-35        | XP_001624782 | 3.00E-08  | aug_v2a.20821 | 0.00E+00  |
| Cluster008461  | Guanylate-binding protein, N-terminal domain | 0.165 | XP_002610120    | Branchiostoma              | 3.00E-22        | XP_001638595 | 3.00E-100 | aug_v2a.02745 | 2.00E-153 |
| Cluster025698  | <b>TIR1 [Acropora millepora]</b>             | 0.161 | <b>ABK78770</b> | <b>No other close hits</b> | <b>0.00E+00</b> | No hit       |           | aug_v2a.12782 | 3.00E-60  |
| Cluster019759  | Neurotrimin                                  | 0.153 | BAH11509        | Homo                       | 2.00E-22        | XP_001624042 | 7.00E-22  | aug_v2a.22439 | 4.00E-152 |
| Cluster017699  | Hemicentin-like                              | 0.153 | AAI57653        | Xenopus                    | 3.00E-27        | XP_001622494 | 1.00E-46  | aug_v2a.17555 | 7.00E-163 |
| Cluster008363  | No significant hits                          | 0.055 |                 |                            |                 | No hit       |           | aug_v2a.03587 | 6.00E-75  |
| Cluster018454  | Conserved novel protein                      | 0.049 | CAK10784        | Danio                      | 2.00E-21        | XP_001621890 | 2.00E-35  | aug_v2a.02341 | 1.00E-74  |
| Cluster020755  | Cysteine protease                            | 0.027 | XP_003643791    | Gallus                     | 1.00E-33        | XP_001636228 | 5.00E-56  | aug_v2a.15295 | 3.00E-57  |
| Cluster006562  | PiggyBac Transposase (Acropora ACT79639)     | 0.027 | JAA62622        | Rhipicephalus              | 9.00E-127       | XP_001630863 | 1.00E-08  | aug_v2a.15307 | 0.00E+00  |
| Cluster000805p | Kyphoscoliosis peptidase                     | 0.014 | EKC30166        | Crassostrea                | 2.00E-43        | XP_001632100 | 2.00E-158 | aug_v2a.09652 | 0.00E+00  |
